# Supplementary material for: Understanding and predicting ciprofloxacin minimum inhibitory concentration in Escherichia coli with machine learning
Source: PubMed Central journal article supplement (PMC7490380; doi:10.1038/s41598-020-71693-5), 2020-09-14
Supplement: 41598_2020_71693_MOESM1_ESM.pdf [file 41598_2020_71693_MOESM1_ESM.pdf]

# Understanding and predicting ciprofloxacin minimum inhibitory concentration in *Escherichia coli* with machine learning

Bálint Ármín Pataki<sup>1,2,\*</sup>, Sébastien Matamoros<sup>3</sup>, Boas C.L. van der Putten<sup>3,6</sup>, Daniel Remondini<sup>4</sup>, Enrico Giampieri<sup>5</sup>, Derya Aytan-Aktug<sup>7</sup>, Rene S. Hendriksen<sup>7</sup>, Ole Lund<sup>8</sup>, István Csabai<sup>1,2</sup>, Constance Schultz<sup>3,6</sup>, and COMPARE ML-AMR group<sup>+</sup>

<sup>1</sup>Department of Physics of Complex Systems, ELTE Eötvös Loránd University, Budapest, Hungary

<sup>2</sup>Department of Computational Sciences, Wigner Research Centre for Physics of the HAS, Budapest, Hungary

<sup>3</sup>Amsterdam UMC, University of Amsterdam, Department of Medical Microbiology, Amsterdam, The Netherlands

<sup>4</sup>Department of Physics and Astronomy (DIFA), University of Bologna, Bologna, Italy

<sup>5</sup>Department of Experimental, Diagnostic and Specialty Medicine (DIMES), University of Bologna, Bologna, Italy

<sup>6</sup>Amsterdam UMC, University of Amsterdam, Department of Global Health, Amsterdam Institute for Global Health and Development, Amsterdam, The Netherlands

<sup>7</sup>National Food Institute, Technical University of Denmark, Lyngby, Denmark

<sup>8</sup>Department of Bioinformatics, Technical University of Denmark, Lyngby, Denmark

<sup>+</sup>see the full list of the COMPARE ML-AMR group members in consortium section

\*Corresponding author, email: patbaa@caesar.elte.hu

## Supplementary materials

| feature            | Denmark | Italy | USA   | UK    | Vietnam | sum   |
|--------------------|---------|-------|-------|-------|---------|-------|
| gyrA#87            | 0.555   | 0.567 | 0.575 | 0.558 | 0.011   | 2.265 |
| gyrA#83            | 0.115   | 0.148 | 0.114 | 0.141 | 0.690   | 1.209 |
| parC#80            | 0.181   | 0.151 | 0.195 | 0.172 | 0.001   | 0.700 |
| qnrS1              | 0.053   | 0.051 | 0.054 | 0.044 | 0.000   | 0.202 |
| blaCTX-M-55        | 0.005   | 0.004 | 0.004 | 0.011 | 0.000   | 0.023 |
| CP009072.1_3517597 | 0.000   | 0.001 | 0.000 | 0.000 | 0.011   | 0.012 |
| CP009072.1_3517591 | 0.001   | 0.001 | 0.000 | 0.000 | 0.009   | 0.011 |
| CP009072.1_1734215 | 0.001   | 0.001 | 0.000 | 0.001 | 0.009   | 0.011 |
| CP009072.1_3517573 | 0.000   | 0.001 | 0.000 | 0.000 | 0.007   | 0.008 |
| CP009072.1_113480  | 0.000   | 0.000 | 0.000 | 0.000 | 0.005   | 0.006 |
| CP009072.1_459777  | 0.001   | 0.002 | 0.000 | 0.002 | 0.000   | 0.005 |
| CP009072.1_1205372 | 0.002   | 0.001 | 0.001 | 0.000 | 0.000   | 0.004 |
| CP009072.1_3517581 | 0.000   | 0.001 | 0.000 | 0.000 | 0.003   | 0.004 |
| CP009072.1_3519619 | 0.000   | 0.000 | 0.000 | 0.000 | 0.003   | 0.004 |
| CP009072.1_1205334 | 0.001   | 0.001 | 0.001 | 0.000 | 0.002   | 0.003 |

**Table S1.** Feature importances of the fitted random forest models. Random forest model was fitted on the training data using leave-one-country-out validation. Each entry shows the feature importance for the given feature for the validation step when the isolates from the given country were not used to train the model. Sorted by the sum of the feature importances. The features are following the gene # amino acid position naming where possible. For the mutations where there were no genes associated, the naming is chromosome name \_ position. For the features coming from ResFinder, the ResFinder resistance gene naming was kept.

| prediction (mg/L) | gyrA#87 | gyrA#83 | parC#80 | qnrS1 |
|-------------------|---------|---------|---------|-------|
| 0.018             | No      | No      | No      | No    |
| 0.060             | No      | No      | Yes     | No    |
| 0.276             | No      | Yes     | No      | No    |
| 0.331             | No      | No      | No      | Yes   |
| 0.448             | Yes     | No      | No      | No    |
| 0.921             | No      | Yes     | Yes     | No    |
| 1.105             | No      | No      | Yes     | Yes   |
| 1.496             | Yes     | No      | Yes     | No    |
| 5.109             | No      | Yes     | No      | Yes   |
| 6.917             | Yes     | Yes     | No      | No    |
| 8.303             | Yes     | No      | No      | Yes   |
| 17.046            | No      | Yes     | Yes     | Yes   |
| 23.079            | Yes     | Yes     | Yes     | No    |
| 27.705            | Yes     | No      | Yes     | Yes   |
| 128.077           | Yes     | Yes     | No      | Yes   |
| 427.339           | Yes     | Yes     | Yes     | Yes   |

**Table S2.** Parameters of the fitted linear regression model. The interception is  $-5.805$ , and the parameters associated with *gyrA#87*, *gyrA#83*, *parC#80*, *qnrS1* are  $4.648$ ,  $3.947$ ,  $1.738$  and  $4.211$ . Prediction is calculated as 2 to the power of the sum of interception and the present mutation/genes. Due to the nature of the linear regression model, it can extrapolate to unrealistically high values. Predictions can be clipped to a reasonable maximum value (eg.  $64$  mg/L), for simplicity that step was omitted.

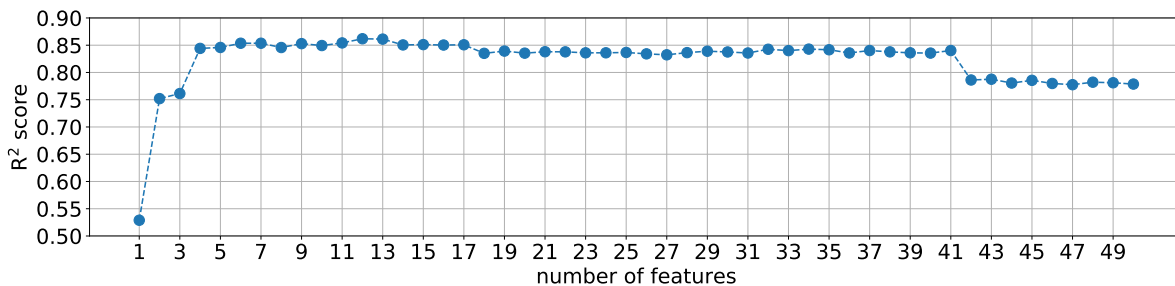

**Figure S1.** R squared score calculated on the training set using random forest model. The features were ranked based on Table S1 and iteratively a random forest model was fitted on the training set with leave-one-country-out validation using the top N features. The R squared score plateaued after  $N=4$ . The addition of more features did not improve the score significantly.

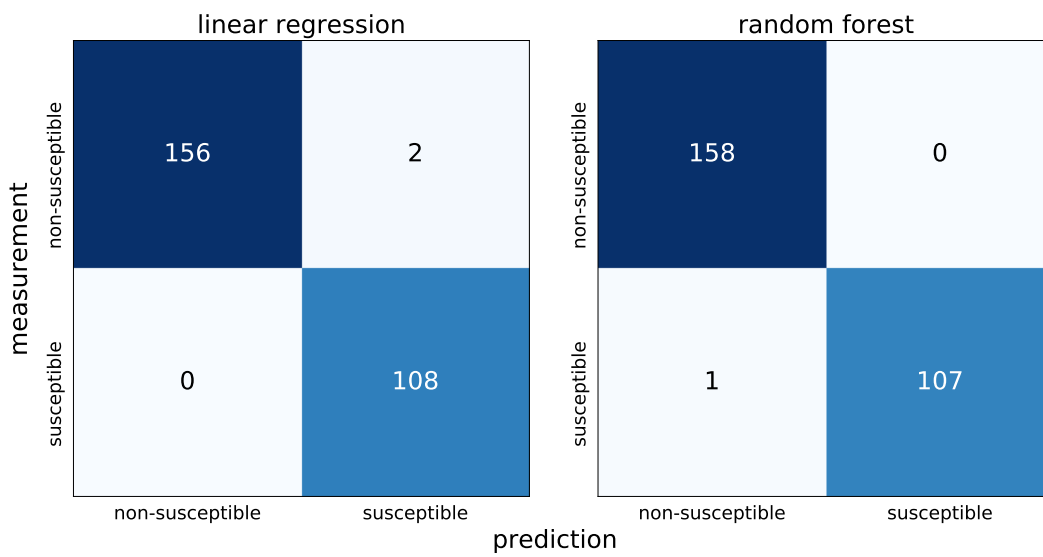

**Figure S2.** Confusion matrix for the linear regression and the random forest models. Both models were trained on the four selected features and were evaluated on the unseen test data. Binary outcomes were obtained via thresholding the MIC values. If the MIC value is higher than 1 mg/L, then the sample is considered to be non-susceptible, otherwise susceptible.

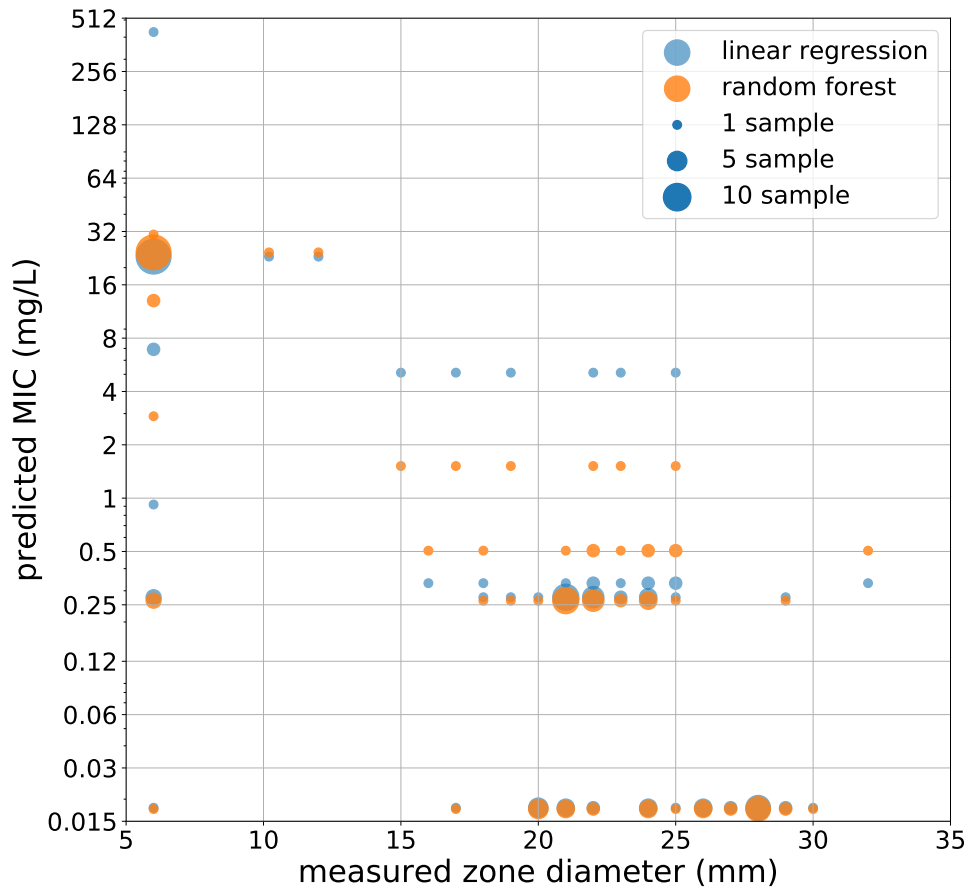

**Figure S3.** Prediction for samples that had only disk diffusion test measurement. As the larger zone diameter corresponds to smaller MIC values, a negative correlation is desirable on this plot. The same models were used with 4 predictors as it was used for the test set.

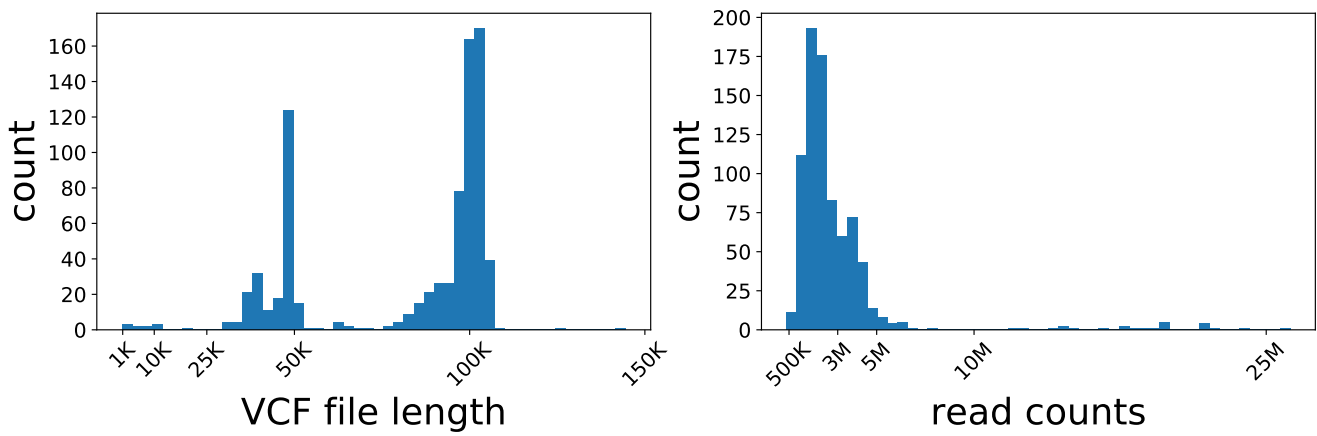

**Figure S4.** VCF file length distribution and the number of raw reads in the collected dataset.
